# Supplementary material for: Adverse effects of CoenzymeQ10 in the treatment of patients with chronic fatigue syndrome/myalgic encephalomyelitis (ME/CFS)
Source: Research Square preprint supplement (doi:10.21203/rs.3.rs-5362194/v1), 2024-12-17
Supplement: Supplementary file 1 [file 390823cb38d147a2a70e3a2f.xlsx]

## Sheet: Blad1
day	dep	numbness	mucus	headache
1	0	1	1	4
2	0	0	1	0
3	0	0	1	0
4	0	0	0	0
5	0	1	1	5
6	6	0	5	3
7	8	5	7	3
8	7	7	7	5
9	7	10	10	5
10	7	10	10	5
11	6	9	10	5
12	6	9	10	5
13	6	10	10	6
14	4	7	9	6
15	3	3	5	2
16	3	3	4	2
17	0	0	1	1
18	0	0	1	1
19
								röd= domningar
								gul = HV
								blå = nedstämdhet
								grå=slem i halsen
